# Supplementary material
Source: Springer Nature journal article supplement (https://www.springermedizin.de/resource/supplementary/13002_2007_92_MOESM1_ESM.pdf/9627140)
Supplement: MOESM1 [file 9627140]

Additional file 1. Medicinal plants used in the Navarre Pyrenees area

| Nº | Species                                                                                         | Local name<br>(Spanish, <i>Euskera</i> )          | PU <sup>a</sup> | Preparation <sup>b</sup> | Popular use (medical category, citations number for this application)                                                    | CF |
|----|-------------------------------------------------------------------------------------------------|---------------------------------------------------|-----------------|--------------------------|--------------------------------------------------------------------------------------------------------------------------|----|
|    | <b>Apocynaceae</b>                                                                              |                                                   |                 |                          |                                                                                                                          |    |
| 1  | <i>Nerium oleander</i> L. (PAMP 18785)                                                          | Adelfa                                            | L               | FU                       | Sinusitis (10, 1)                                                                                                        | 1  |
|    | <b>Araliaceae</b>                                                                               |                                                   |                 |                          |                                                                                                                          |    |
| 2  | <i>Hedera helix</i> L. (PAMP 18786)                                                             | Hiedra                                            | LS              | M                        | Toothache (10, 1)                                                                                                        | 1  |
|    | <b>Asteraceae</b>                                                                               |                                                   |                 |                          |                                                                                                                          |    |
| 3  | <i>Achillea millefolium</i> L.<br>(PAMP 18636-18638)                                            | Milenrama                                         | F               | I<br>O                   | Period pains (3, 1); digestive (4, 1)<br>Spots (2, 1)                                                                    | 3  |
| 4  | <i>Arctium minus</i> Bernh. (PAMP 18639)                                                        | Bardana, hojas de lamparagón                      | R, L            | MAL, P                   | Wounds, spots (2, 4)                                                                                                     | 4  |
| 5  | <i>Bellis perennis</i> L. (PAMP 19879)                                                          | Margarita                                         | FT              | R                        | For health protection (11, 1)                                                                                            | 1  |
| 6  | <i>Calendula officinalis</i> L. (PAMP 18787, 18788)                                             | Caléndula                                         | F               | O, OW<br>MAO             | Burns, wounds (2, 2)<br>Earache (10, 1)                                                                                  | 3  |
| 7  | <i>Carlina acaulis</i> L. (PAMP 19880)                                                          | <i>Eguzkilore</i>                                 | AP              | R                        | Protection from diseases and evil spirits (11, 2)                                                                        | 2  |
| 8  | <i>Chamaemelum nobile</i> (L.) All. (PAMP 18640, 18641)                                         | Manzanilla, manzanilla del monte, <i>kamamila</i> | F               | I, MAN<br>OW<br>MAO      | Intestinal pain, constipation and stomach ache (4, 18);<br>sedative (7, 1)<br>To clean the eyes (10, 1)<br>Wounds (2, 1) | 21 |
| 9  | <i>Cichorium intybus</i> L. (PAMP 18789)                                                        | Achicoria silvestre                               | LX              | DA                       | Warts (2, 1)                                                                                                             | 1  |
| 10 | <i>Jasonia glutinosa</i> (L.) DC. (PAMP 18642)                                                  | Té de roca, té de peña                            | F               | I                        | Stimulating (7, 9); digestive (4, 4)                                                                                     | 13 |
| 11 | <i>Jasonia tuberosa</i> (L.) DC. (PAMP 19881)                                                   | Té de suelo                                       | AP              | I                        | Stimulating (7, 1)                                                                                                       | 1  |
| 12 | <i>Lactuca serriola</i> L. (PAMP 19882)                                                         | Lehecino                                          | LX              | DA                       | Warts (2, 1)                                                                                                             | 1  |
| 13 | <i>Santolina chamaecyparissus</i> L. ssp. <i>squarrosa</i> (DC) Nyman (PAMP 18643-18649, 18749) | Manzanilla, manzanilla del monte                  | F               | I, MAN<br>SB<br>O        | Digestive (4, 25)<br>Women's intimate hygiene (3, 1)<br>Wounds (2, 1)                                                    | 27 |
| 14 | <i>Sonchus oleraceus</i> L. (PAMP 19883)                                                        | Lehecino                                          | LX              | DA                       | Warts (2, 1)                                                                                                             | 1  |
| 15 | <i>Tanacetum parthenium</i> Schultz Bip. (PAMP 18650)                                           | Manzanilla, manzanilla de la huerta               | F               | I<br>OW<br>SB            | Digestive (4, 2)<br>To clean the eyes (10, 1)<br>Women's intimate hygiene (3, 1)                                         | 4  |
| 16 | <i>Taraxacum officinale</i> group. (PAMP 18651)                                                 | Diente de león                                    | R, LX           | MAO<br>DA<br>C           | Spring cure for the liver (3, 1)<br>Warts (2, 1)<br>To purify the body (1, 1)                                            | 3  |
| 17 | <i>Tussilago farfara</i> L. (PAMP 18652-18656)                                                  | Patamula                                          | L               | P, DA                    | Boils and wounds (2, 5)                                                                                                  | 6  |

|    |                                                               |                                       |                  |                                           |                                                                                                                                                                                                                                                   |    |
|----|---------------------------------------------------------------|---------------------------------------|------------------|-------------------------------------------|---------------------------------------------------------------------------------------------------------------------------------------------------------------------------------------------------------------------------------------------------|----|
|    |                                                               |                                       |                  | I                                         | Cold (8, 1)                                                                                                                                                                                                                                       |    |
|    | <b>Betulaceae</b>                                             |                                       |                  |                                           |                                                                                                                                                                                                                                                   |    |
| 18 | <i>Corylus avellana</i> L. (PAMP 18790)                       | Avellano                              | L                | MAO                                       | Skin diseases (2, 1)                                                                                                                                                                                                                              | 1  |
|    | <b>Boraginaceae</b>                                           |                                       |                  |                                           |                                                                                                                                                                                                                                                   |    |
| 19 | <i>Symphytum officinale</i> L. (PAMP 18657, 18658)            | Consuelda                             | R                | O                                         | Anti-inflammatory (6, 1); blows, rheumatism, osteoarthritis (5, 1)                                                                                                                                                                                | 2  |
| 20 | <i>Symphytum tuberosum</i> L. (PAMP 18659)                    | Consuelda menor                       | R                | P                                         | Anti-inflammatory (6, 2)                                                                                                                                                                                                                          | 2  |
|    | <b>Brassicaceae</b>                                           |                                       |                  |                                           |                                                                                                                                                                                                                                                   |    |
| 21 | <i>Brassica oleracea</i> L. var. <i>oleracea</i> (PAMP 19884) | Berza                                 | L                | O                                         | Herpes (2, 1)                                                                                                                                                                                                                                     | 1  |
| 22 | <i>Capsella bursa-pastoris</i> (L.) Medik (PAMP 18807)        | Bolsa de pastor                       | AP               | I                                         | To regulate menstruation (3, 1)                                                                                                                                                                                                                   | 1  |
| 23 | <i>Rorippa nasturtium-aquaticum</i> (L.) Hayek (PAMP 18791)   | Berro                                 | L                | C                                         | Blood problems (e.g. blood-flow) (1, 1)                                                                                                                                                                                                           | 1  |
|    | <b>Buxaceae</b>                                               |                                       |                  |                                           |                                                                                                                                                                                                                                                   |    |
| 24 | <i>Buxus sempervirens</i> L. (PAMP 18660)                     | Boj                                   | L                | R                                         | Warts (2, 1)                                                                                                                                                                                                                                      | 1  |
|    | <b>Caprifoliaceae</b>                                         |                                       |                  |                                           |                                                                                                                                                                                                                                                   |    |
| 25 | <i>Sambucus nigra</i> L. (PAMP 18661-18668)                   | Sáuco, <i>sabuko</i>                  | F, L,<br>FR<br>B | I, IH, D, SY, C,<br>MAN, FU, P<br>O<br>OW | Cold, and headaches caused by a cold (8, 17); stomach ache (4, 1)<br>Toothache and sore throat, (10, 16); anti-inflammatory, pains (6, 2);<br>abscess, burns, spots, wounds and psoriasis (2, 14)<br>Problems with the eyes (swelling...) (10, 1) | 51 |
|    | <b>Crassulaceae</b>                                           |                                       |                  |                                           |                                                                                                                                                                                                                                                   |    |
| 26 | <i>Hylotelephium maximum</i> (L.) Holub (PAMP 18669, 18746)   | Curamal, curamales, curalotodo        | L                | DA                                        | Spots, pricks, wounds and to clean gangrene (2, 9)                                                                                                                                                                                                | 9  |
| 27 | <i>Sedum</i> sp. (PAMP 19885)                                 | Hierba para almorranas                | AP               | P                                         | Piles (2, 2)                                                                                                                                                                                                                                      | 2  |
| 28 | <i>Umbilicus rupestris</i> (Salisb.) Dandy (PAMP 18792)       | Ombbligo de venus                     | L                | P                                         | Injuries (2, 1)                                                                                                                                                                                                                                   | 1  |
|    | <b>Equisetaceae</b>                                           |                                       |                  |                                           |                                                                                                                                                                                                                                                   |    |
| 29 | <i>Equisetum arvense</i> L. (PAMP 18670, 18671)               | <i>Axari buzten</i> , cola de caballo | SP               | I, D<br>P                                 | Hypertension (1, 1); calcium deficiency (5, 2); diuretic (9, 2); kidney stones (3, 1)<br>Sore throat (10, 1)                                                                                                                                      | 7  |
|    | <b>Ericaceae</b>                                              |                                       |                  |                                           |                                                                                                                                                                                                                                                   |    |
| 30 | <i>Arctostaphylos uva-ursi</i> (L.) Sprengel (PAMP 18793)     | Gayuba                                | S, L             | I                                         | Kidney stones (9, 1); prostate problems (3, 1)                                                                                                                                                                                                    | 2  |
|    | <b>Fabaceae</b>                                               |                                       |                  |                                           |                                                                                                                                                                                                                                                   |    |
| 31 | <i>Dorycnium pentaphyllum</i> Scop. (PAMP 18672)              | Planta para las piedras del riñón     | AP               | I                                         | Kidney stones (9, 1)                                                                                                                                                                                                                              | 1  |
|    | <b>Fagaceae</b>                                               |                                       |                  |                                           |                                                                                                                                                                                                                                                   |    |

|                     |                                                                                              |                                                   |              |                    |                                                                                                                                                             |    |
|---------------------|----------------------------------------------------------------------------------------------|---------------------------------------------------|--------------|--------------------|-------------------------------------------------------------------------------------------------------------------------------------------------------------|----|
| 32                  | <i>Fagus sylvatica</i> L. ssp. <i>sylvatica</i> (PAMP 18794)                                 | Haya, <i>pagoa</i>                                | B, L         | B                  | Cold (8, 1); deep wounds caused by an axe (2, 1)                                                                                                            | 2  |
| 33                  | <i>Quercus</i> sp. (18806)                                                                   | Roble                                             | B            | B                  | Cold (8, 1)                                                                                                                                                 | 1  |
| <b>Gentianaceae</b> |                                                                                              |                                                   |              |                    |                                                                                                                                                             |    |
| 34                  | <i>Centaurium erythraea</i> Rafn (PAMP 18673)                                                |                                                   | AP           | I                  | To purify the blood (1, 2)                                                                                                                                  | 2  |
| 35                  | <i>Centaurium erythraea</i> Rafn ssp. <i>majus</i> (Hoffmanns. & Link) M. Lainz (PAMP 18674) | Hierba para el hígado                             | AP           | I                  | Liver pain (3, 1); sedative (7, 1)                                                                                                                          | 2  |
| <b>Geraniaceae</b>  |                                                                                              |                                                   |              |                    |                                                                                                                                                             |    |
| 36                  | <i>Geranium robertianum</i> L. (PAMP 18675)                                                  | -                                                 | AP           | P                  | Wounds (2, 1)                                                                                                                                               | 1  |
| <b>Guttiferae</b>   |                                                                                              |                                                   |              |                    |                                                                                                                                                             |    |
| 37                  | <i>Hypericum perforatum</i> L. (PAMP 18676-18680)                                            | Hipérico, hipérico del roncal, hierba de San Juan | FT           | I<br>MAO<br>MAL    | Stimulating (7, 1); diarrhoea (4, 6)<br>Burns, wounds, skin troubles (2, 5); sore throat (10, 1)<br>Muscular pains (5, 2)                                   | 15 |
| <b>Juglandaceae</b> |                                                                                              |                                                   |              |                    |                                                                                                                                                             |    |
| 38                  | <i>Juglans regia</i> L. (PAMP 18681-18683)                                                   | Nogal                                             | BD, L,<br>FR | D, MAN<br>G<br>MAW | Stomach ache, diarrhoea caused by stomach colds (4, 3); to heal wounds in animals (12, 3)<br>To clean the mouth (10, 1)<br>For menstruation problems (3, 1) | 8  |
| <b>Lamiaceae</b>    |                                                                                              |                                                   |              |                    |                                                                                                                                                             |    |
| 39                  | <i>Lavandula angustifolia</i> Bub. ssp. <i>pyrenaica</i> (DC) Guinea (PAMP 18684, 18685)     | Lavanda, espliego                                 | F            | I<br>PE            | Digestive (4, 2)<br>Other traditional uses (for foot odour) (11, 1)                                                                                         | 3  |
| 40                  | <i>Marrubium vulgare</i> L. (PAMP 18686)                                                     | Marrubio blanco                                   | AP           | I                  | Old colds (8, 1)                                                                                                                                            | 1  |
| 41                  | <i>Melissa officinalis</i> L. (PAMP 18687-18690)                                             | Melisa, salvia                                    | AP, L        | I<br>P             | Digestive (4, 1); sedative (7, 1)<br>Problems with tendons and joints, rheumatism (5, 1)                                                                    | 3  |
| 42                  | <i>Mentha longifolia</i> Huds. (PAMP 18691)                                                  | Menta                                             | AP           | I                  | Stomach ache (4, 1)                                                                                                                                         | 1  |
| 43                  | <i>Mentha spicata</i> L. (PAMP 18692-18694)                                                  | Menta                                             | L            | I                  | Digestive (4, 4)                                                                                                                                            | 4  |
| 44                  | <i>Mentha suaveolens</i> Ehrh. (PAMP 18803)                                                  | <i>Menda</i> , menta                              | L            | I                  | Digestive (4, 1); sedative (7, 1)                                                                                                                           | 2  |
| 45                  | <i>Ocimum basilicum</i> L. (PAMP 18695)                                                      | Hierbabuena                                       | L            | I                  | Digestive (4, 1)                                                                                                                                            | 1  |
| 46                  | <i>Origanum vulgare</i> L. (PAMP 18695)                                                      | Orégano                                           | F            | I                  | Digestive (4, 1)                                                                                                                                            | 1  |

|                      |                                                                                                             |                                                            |      |                     |                                                                                                                                                                                                             |    |
|----------------------|-------------------------------------------------------------------------------------------------------------|------------------------------------------------------------|------|---------------------|-------------------------------------------------------------------------------------------------------------------------------------------------------------------------------------------------------------|----|
| 47                   | <i>Rosmarinus officinalis</i> L. (PAMP 18804)                                                               | Romero                                                     | AP   | I<br>MAL, MAW<br>PE | To prevent and cure colds (8, 1); to clean blood (1, 1); digestive (4, 1); stimulant (7, 1)<br>Muscular pain and rheumatism (5, 1)<br>For foot odour (11, 1)                                                | 6  |
| 48                   | <i>Salvia officinalis</i> L. (PAMP 18696-18697)                                                             | Salvia                                                     | AP   | I                   | Cold (8, 1); for menstrual pain (3, 1)                                                                                                                                                                      | 2  |
| 49                   | <i>Sideritis hyssopifolia</i> L. ssp. <i>guillonii</i> (Timb.-Lagr.) Rouy (PAMP 18698, 18699, 18750, 18751) | Té de roca                                                 | AP   | I                   | Stomach ache, digestive (4, 5)                                                                                                                                                                              | 5  |
| 50                   | <i>Thymus praecox</i> Opiz subsp. <i>polytrichus</i> (A. Kerner ex Barbás) Jalas (PAMP 18700)               | Orégano de monte                                           | AP   | I                   | Cold (8, 1)                                                                                                                                                                                                 | 1  |
| 51                   | <i>Thymus vulgaris</i> L. ssp. <i>vulgaris</i> (PAMP 18701-18703)                                           | Tomillo                                                    | AP   | I<br>PE<br>G<br>MAO | To regulate blood pressure (1, 1); to prevent and cure colds (8, 4); for stomach colds, stomach ache (4, 2)<br>For foot odour (11, 1)<br>To clean the mouth (10, 1)<br>Deafness caused by wax plugs (10, 2) | 11 |
| <b>Liliaceae</b>     |                                                                                                             |                                                            |      |                     |                                                                                                                                                                                                             |    |
| 52                   | <i>Allium ampeloprasum</i> L. (PAMP 19886)                                                                  | Puerro                                                     | S, L | D                   | To purify blood (1, 1); diuretic (9, 1)                                                                                                                                                                     | 2  |
| 53                   | <i>Allium cepa</i> L. (PAMP 19887)                                                                          | Cebolla                                                    | L    | P, DA,<br>R         | Infected spots, to heal (2, 14); fever (6, 1)<br>Cough (8, 1)                                                                                                                                               | 16 |
| 54                   | <i>Allium sativum</i> L. (PAMP 19888)                                                                       | Ajo                                                        | L    | I, MAN, P<br>R      | Tapeworm (4, 1); rheumatism (5, 2); wounds, burn (2, 3); cold (8,1)<br>For distemper in dogs and cats (12, 1)                                                                                               | 8  |
| 55                   | <i>Asparagus officinalis</i> L. (PAMP 19889)                                                                | Espárrago                                                  | S    | C                   | To clean blood (1, 1)                                                                                                                                                                                       | 1  |
| 56                   | <i>Ruscus aculeatus</i> L. (PAMP 18704, 18705)                                                              | Ispelco                                                    | AP   | R                   | Protection from diseases and evil spirits (11, 3)                                                                                                                                                           | 3  |
| <b>Loranthaceae</b>  |                                                                                                             |                                                            |      |                     |                                                                                                                                                                                                             |    |
| 57                   | <i>Viscum album</i> L. (PAMP 18811)                                                                         | <i>Bizko, migula, mihura, muérdago, muérdago de espino</i> | S, L | I, D                | To regulate blood pressure (1, 8)                                                                                                                                                                           | 8  |
| <b>Lycoperdaceae</b> |                                                                                                             |                                                            |      |                     |                                                                                                                                                                                                             |    |
| 58                   | <i>Lycoperdon</i> sp. (PAMP 19890)                                                                          | Pedo de lobo                                               | SR   | P                   | Wounds (2, 2)                                                                                                                                                                                               | 2  |
| <b>Lythraceae</b>    |                                                                                                             |                                                            |      |                     |                                                                                                                                                                                                             |    |
| 59                   | <i>Lythrum salicaria</i> L. (PAMP 18706, 18707)                                                             | Hierba para las diarreas                                   | FT   | D                   | Diarrhoea (4, 1)                                                                                                                                                                                            | 1  |
| <b>Malvaceae</b>     |                                                                                                             |                                                            |      |                     |                                                                                                                                                                                                             |    |
| 60                   | <i>Althaea officinalis</i> L. (PAMP 18805)                                                                  | Malvavisco                                                 | F    | I                   | Cold (8, 1)                                                                                                                                                                                                 | 1  |
| 61                   | <i>Malva neglecta</i> Wallr (PAMP 18708)                                                                    | Malva                                                      | AP   | P                   | Wound (2, 1)                                                                                                                                                                                                | 1  |
| 62                   | <i>Malva sylvestris</i> L. (PAMP 18709, 18710, 18747, 18748)                                                | Malva                                                      | WP   | I, D<br>P, O        | To clean blood (1, 1); colds (8, 1)<br>For horses' wounds (12, 4); boils (2, 3)                                                                                                                             | 9  |
| <b>Moraceae</b>      |                                                                                                             |                                                            |      |                     |                                                                                                                                                                                                             |    |

|    |                                                         |                                                  |             |            |                                                                                                         |    |
|----|---------------------------------------------------------|--------------------------------------------------|-------------|------------|---------------------------------------------------------------------------------------------------------|----|
| 63 | <i>Ficus carica</i> L. (PAMP 18801)                     | Higuera                                          | LX<br>L     | DA<br>FU   | Warts (2, 3)<br>Gumboils (10, 1)                                                                        | 4  |
|    | <b>Myrtaceae</b>                                        |                                                  |             |            |                                                                                                         |    |
| 64 | <i>Eucalyptus globulus</i> Labill (PAMP 18800)          | Eucalipto                                        | L           | SY         | Cold (8, 1)                                                                                             | 1  |
|    | <b>Papaveraceae</b>                                     |                                                  |             |            |                                                                                                         |    |
| 65 | <i>Chelidonium majus</i> L. (PAMP 1871, 18712)          | Celidonia,<br><i>iodobelarra</i>                 | LX, L<br>S  | DA, O<br>I | Wounds, fungal growth and warts (2, 5)<br>Sedative (7, 1); diuretic (9, 1)                              | 7  |
|    | <b>Pinaceae</b>                                         |                                                  |             |            |                                                                                                         |    |
| 66 | <i>Pinus sylvestris</i> L. (PAMP 18798)                 | Pino                                             | B           | P          | Wounds (2, 1)                                                                                           | 1  |
|    | <b>Plantaginaceae</b>                                   |                                                  |             |            |                                                                                                         |    |
| 67 | <i>Plantago lanceolata</i> L. (PAMP 18713-18715)        | Aquinácea, llantén,<br>plantago menor            | RZ, L       | D<br>P, DA | Bronchitis (8, 2)<br>Mouth pain (10, 1); mouthache and bleeding gums (2, 1)                             | 4  |
| 68 | <i>Plantago major</i> L. (PAMP 18716, 18717)            | Plantago mayor                                   | L           | P<br>DA    | Mouthache and bleeding gums (10, 1)<br>Wounds (2, 4)                                                    | 5  |
|    | <b>Poaceae</b>                                          |                                                  |             |            |                                                                                                         |    |
| 69 | <i>Triticum aestivum</i> L. (18797)                     | Trigo                                            | FR          | P          | Bronchial problems (8, 1)                                                                               | 1  |
| 70 | <i>Zea mays</i> L. (PAMP 19891)                         | Maíz                                             | F           | I          | Diuretic (9, 1)                                                                                         | 1  |
|    | <b>Primulaceae</b>                                      |                                                  |             |            |                                                                                                         |    |
| 71 | <i>Anagallis foemina</i> Mill. (PAMP 18718)             | <i>Pasmobelarra</i>                              | AP          | I<br>O     | Respiratory infections (8, 1)<br>Spots (2, 1)                                                           | 2  |
|    | <b>Rhamnaceae</b>                                       |                                                  |             |            |                                                                                                         |    |
| 72 | <i>Rhamnus alaternus</i> L. (PAMP 18796)                | Carrasquilla,<br><i>karraskila</i>               | BR          | D          | To make blood more fluid (1, 3); rheumatism (5, 1); cold (8, 1)                                         | 5  |
|    | <b>Rosaceae</b>                                         |                                                  |             |            |                                                                                                         |    |
| 73 | <i>Agrimonia eupatoria</i> L. (PAMP 18719, 18720)       | Agrimonia                                        | AP          | I, G       | Sore throat (10, 2); stomach ache (4, 1); cold (8, 1)                                                   | 4  |
| 74 | <i>Crataegus monogyna</i> Jacq (PAMP 18721-18723)       | Espino blanco, flor<br>del corazón,<br>gurrillón | F, FR       | I, MAN, D  | For problems in heart functioning, hypertension, varicose<br>veins (1, 6)                               | 6  |
| 75 | <i>Fragaria vesca</i> L. ssp. <i>vesca</i> (PAMP 18802) | Fresa                                            | R           | D          | Prostate problems (3, 1)                                                                                | 1  |
| 76 | <i>Malus sylvestris</i> Mill. (PAMP 19892)              | Manzano, <i>patxaka</i>                          | FR          | MAN        | Stomach ache (4, 1)                                                                                     | 1  |
| 77 | <i>Potentilla reptans</i> L. (PAMP 18795)               | Cincoenrama                                      | WP          | P          | Wounds (2, 1)                                                                                           | 1  |
| 78 | <i>Prunus spinosa</i> L. (PAMP 19893)                   | <i>Patxaran</i>                                  | FR<br>BR, R | MAN<br>D   | Stomach ache, diarrhoea caused by stomach colds (4, 9)<br>Hypertension, to make blood more fluid (1, 2) | 11 |

|    |                                                           |                                        |            |                    |                                                                                                                                                       |    |
|----|-----------------------------------------------------------|----------------------------------------|------------|--------------------|-------------------------------------------------------------------------------------------------------------------------------------------------------|----|
| 79 | <i>Rosa canina</i> L. (PAMP 18725-18728, 18809)           | Cabardas, cabarderas, rosa, escaramujo | FR<br>F, B | I, C, MAN<br>D, OW | Diarrhoea (4, 5); sore throat (10, 1); cold (8, 4)<br>Hypertension (1, 1); to clean the eyes (10, 3)                                                  | 1P |
| 80 | <i>Rubus ulmifolius</i> Schott (PAMP 18729)               | Zarza, zarzamora                       | NS         | I<br>G             | Diarrhoea caused by stomach colds (4, 3)<br>For cleanness the mouth (10, 1)                                                                           | 4  |
|    | <b>Rutaceae</b>                                           |                                        |            |                    |                                                                                                                                                       |    |
| 81 | <i>Citrus aurantium</i> L. (PAMP 19894)                   | Naranja                                | F          | D                  | Prostate problems (3, 1)                                                                                                                              | 1  |
| 82 | <i>Citrus limon</i> (L.) Burm (PAMP 19895)                | Limón                                  | FR         | J                  | Sore throat (10, 1)                                                                                                                                   | 1  |
|    | <b>Saxifragaceae</b>                                      |                                        |            |                    |                                                                                                                                                       |    |
| 83 | <i>Saxifraga longifolia</i> Lapeyr (PAMP 19896)           |                                        | L          | T                  | For deafness caused by wax plugs (10, 1)                                                                                                              | 1  |
|    | <b>Scrophulariaceae</b>                                   |                                        |            |                    |                                                                                                                                                       |    |
| 84 | <i>Scrophularia auriculata</i> L. (PAMP 18730)            | Escrofularia                           | WP         | P                  | Antibiotic and anti-inflammatory (6, 1)                                                                                                               | 1  |
| 85 | <i>Verbascum thapsus</i> L. (PAMP 18731-18733)            | Hierba para almorranas                 | R, L       | R<br>I             | Hemorrhoids (2, 1)<br>Respiratory infections (8, 2)                                                                                                   | 3  |
|    | <b>Solanaceae</b>                                         |                                        |            |                    |                                                                                                                                                       |    |
| 86 | <i>Lycopersicon esculentum</i> Mill. (PAMP 19897)         | Tomate                                 | F          | P, DA              | Toothache and sore throat (10, 2)                                                                                                                     | 2  |
|    | <b>Tamaricaceae</b>                                       |                                        |            |                    |                                                                                                                                                       |    |
| 87 | <i>Tamarix gallica</i> L. (PAMP 18810)                    | Taray                                  |            | P                  | For foot odour (11, 1)                                                                                                                                | 1  |
|    | <b>Tiliaceae</b>                                          |                                        |            |                    |                                                                                                                                                       |    |
| 88 | <i>Tilia platyphyllos</i> Scop. (PAMP 18734-18738, 18752) | Tilo, tilo de montaña                  | FT         | I                  | Sedative (7, 13); for sick animals (12, 1)                                                                                                            | 14 |
|    | <b>Umbelliferae</b>                                       |                                        |            |                    |                                                                                                                                                       |    |
| 89 | <i>Foeniculum vulgare</i> L. (PAMP 19898)                 | Hinojo                                 | AP         | R                  | Other traditional uses (protection from diseases and evil spirits) (11, 1)                                                                            | 1  |
|    | <b>Urticaceae</b>                                         |                                        |            |                    |                                                                                                                                                       |    |
| 90 | <i>Urtica dioica</i> L. (PAMP 18739)                      | Ortiga, atsunes                        | AP         | C, I<br>F          | To improve blood circulation, cholesterol (1, 9); for weak hair (10, 2); depurative, diuretic (9, 2);<br>Backache and rheumatism (5, 7); pains (6, 2) | 22 |

|    |                                                  |         |    |        |                                                                                                                                                                                                                                            |    |
|----|--------------------------------------------------|---------|----|--------|--------------------------------------------------------------------------------------------------------------------------------------------------------------------------------------------------------------------------------------------|----|
|    | <b>Verbenaceae</b>                               |         |    |        |                                                                                                                                                                                                                                            |    |
| 91 | <i>Verbena officinalis</i> L. (PAMP 18740-18745) | Verbena | AP | P<br>I | Sore throat (10, 2); cold, chest congestion, bronchitis, asthma and bronchitis (8, 9); wounds and to ripen the grains (2, 5); pains, anti-inflammatory (6, 1)<br>Other traditional uses (for old diseases) (11, 1);<br>stimulanting (7, 1) | 19 |
|    | <b>Violaceae</b>                                 |         |    |        |                                                                                                                                                                                                                                            |    |
| 92 | <i>Viola riviniana</i> Reichenb. (PAMP 18808)    | Violeta | F  | I      | Sinusitis (10, 1)                                                                                                                                                                                                                          | 1  |

**Parts used:** AP: aerial part; B: bark; BD: bud; BR: branch; F: flower; FR: fruits; FT: floral top; L: leaf; LS: leaf-stalk; LX: latex; NS: new shoot; R: root; RZ: rhizome; S: stem; SP: sterile plant; SR: spore; WP: whole plant. **Preparations:** B: bath; C: comestible; DA: direct application; D: decoction; F: friction; FU: fume; G: gargling; I: infusion; IH: inhalation; J: juice; MAL: maceration in alcohol; MAN: maceration in anisette; MAO: maceration in oil; MAW: maceration in wine; M: to masticate; O: ointment; OW: ocular washed; PE: pediluvium; P: poultice; R: rite; SB: sitz bath; SY: syrup.
